# Supplementary material for: Gut Acidification Impairment Links Commensal Decline to Infantile Eczema：A cross-sectional study
Source: Research Square preprint supplement (doi:10.21203/rs.3.rs-7226477/v1), 2025-09-26
Supplement: Supplementary file 1 [file b61b0ae2aa3c611ff7755da8.pdf]

## **Supplementary information**

**Supplementary Table S1. The comparison of attribution of network between Ecz and Nor.**

| Network index                           | Group | Feces       | YCFA        | XYI         | LAT         | GOS         | FOS         | INU         | p value | q value |
|-----------------------------------------|-------|-------------|-------------|-------------|-------------|-------------|-------------|-------------|---------|---------|
| Number of nodes                         | NC    | 47          | 41          | 44          | 42          | 38          | 42          | 44          | 0.5117  | 0.4594  |
|                                         | EC    | 44          | 41          | 39          | 41          | 42          | 42          | 43          |         |         |
| Number of edges                         | NC    | 133         | 111         | 118         | 90          | 81          | 100         | 115         | 0.3176  | 0.4419  |
|                                         | EC    | 87          | 108         | 93          | 79          | 103         | 94          | 116         |         |         |
| Negative edge<br>(negative edge rate) * | NC    | 65<br>(49%) | 42<br>(38%) | 40<br>(34%) | 40<br>(44%) | 26<br>(32%) | 24<br>(24%) | 44<br>(38%) | 0.0012  | 0.0047  |
|                                         | EC    | 24<br>(28%) | 22<br>(20%) | 14<br>(15%) | 11<br>(14%) | 9<br>(9%)   | 21<br>(22%) | 23<br>(20%) |         |         |
| Average neighbors                       | NC    | 5.66        | 5.42        | 5.36        | 4.29        | 4.46        | 4.76        | 5.23        | 0.3829  | 0.4419  |
|                                         | EC    | 3.96        | 5.27        | 4.90        | 4.05        | 4.91        | 4.48        | 5.40        |         |         |
| Characteristic path length              | NC    | 2.64        | 2.52        | 3.15        | 3.06        | 2.61        | 3.57        | 2.83        | 0.0379  | 0.1020  |
|                                         | EC    | 3.60        | 3.14        | 2.92        | 4.29        | 4.65        | 3.87        | 2.87        |         |         |
| Clustering coefficient                  | NC    | 0.35        | 0.33        | 0.57        | 0.37        | 0.36        | 0.58        | 0.50        | 0.3339  | 0.4419  |
|                                         | EC    | 0.44        | 0.54        | 0.51        | 0.49        | 0.55        | 0.57        | 0.45        |         |         |
| Network density                         | NC    | 0.12        | 0.14        | 0.13        | 0.11        | 0.13        | 0.12        | 0.12        | 0.4814  | 0.4594  |
|                                         | EC    | 0.09        | 0.13        | 0.13        | 0.11        | 0.12        | 0.11        | 0.13        |         |         |
| Network heterogeneity                   | NC    | 0.43        | 0.45        | 0.45        | 0.38        | 0.43        | 0.39        | 0.48        | 0.1200  | 0.2425  |
|                                         | EC    | 0.47        | 0.47        | 0.45        | 0.53        | 0.55        | 0.42        | 0.44        |         |         |
| Network centralization                  | NC    | 0.12        | 0.12        | 0.14        | 0.07        | 0.11        | 0.11        | 0.19        | 0.9755  | 0.7882  |
|                                         | EC    | 0.10        | 0.15        | 0.15        | 0.08        | 0.13        | 0.12        | 0.12        |         |         |

\*  $q < 0.05$

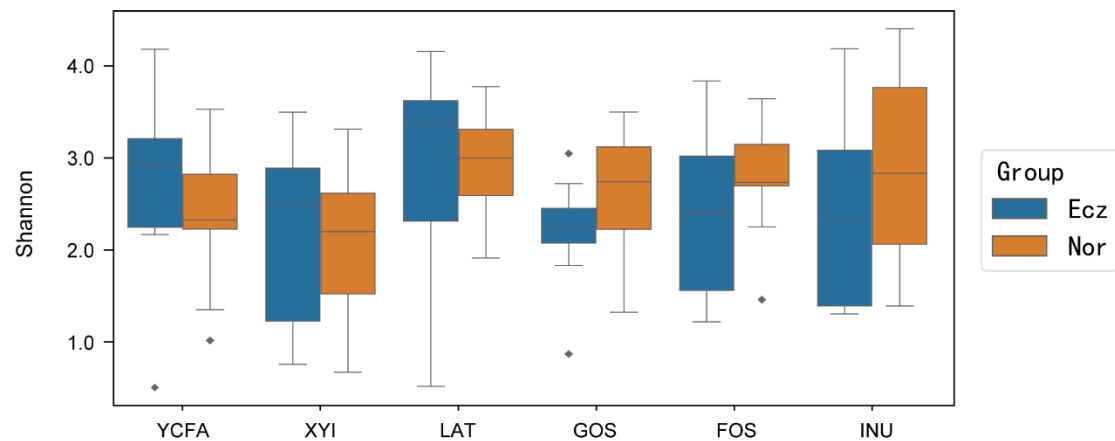

**Supplementary Fig. S1 Comparison of  $\alpha$ -diversity in fermentation broths' microbiota between Ecz and Nor.**

Box plots of the Shannon index of each fermentation broth showed no statistical significance. YCFA: the basic medium without carbon source; the medium containing YCFA and sole carbon source of xylitol (XYI), lactose (LAT), GOS, FOS, and inulin (INU). Data in box plots are presented as medians and interquartile ranges, whiskers: 1.5x interquartile, points: outliers, and statistical analysis was performed using the Mann-Whitney test.

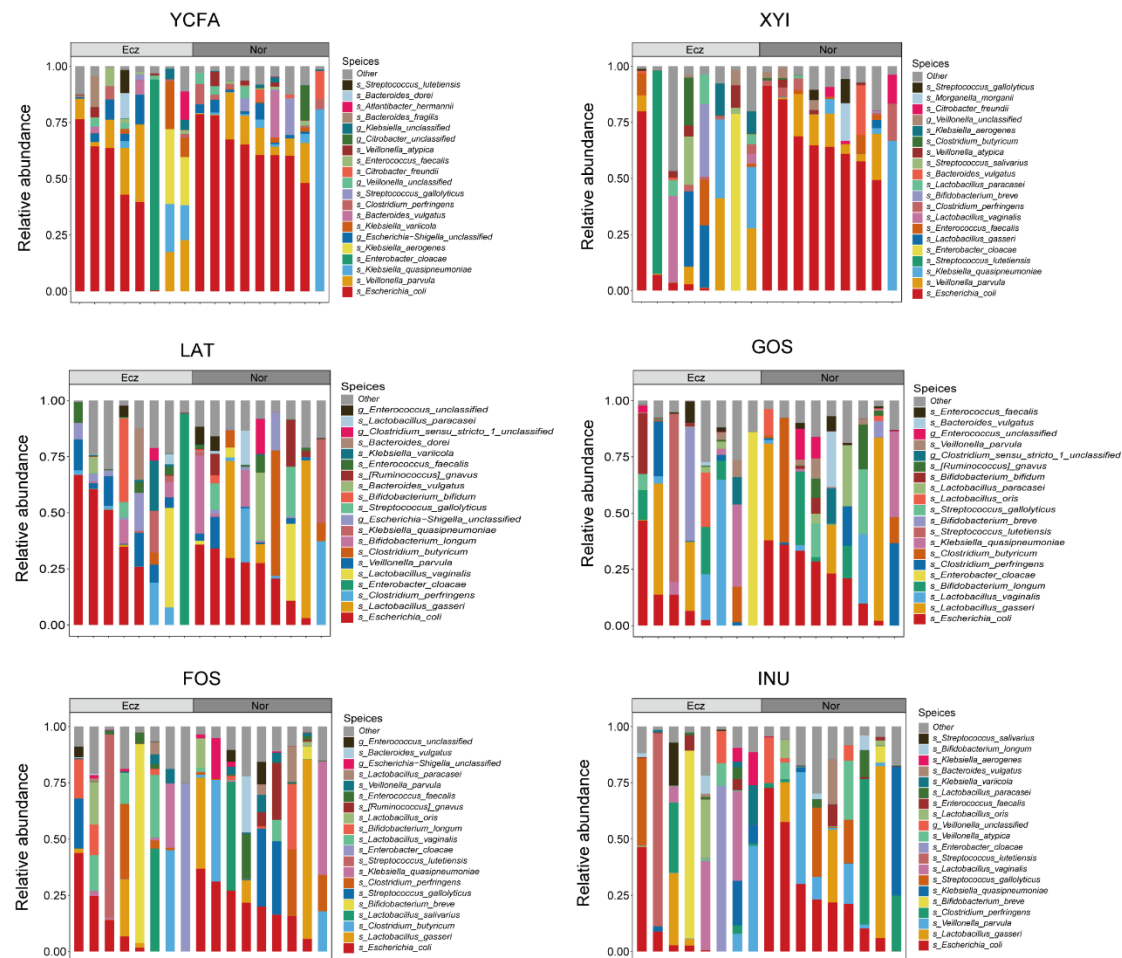

**Supplementary Fig. S2 Comparison of top 20 species in fermentation broths' microbiota between Ecz and Nor.**

The stacked column chart of top 20 species in each broth. YCFA: the basic medium without carbon source; the medium containing YCFA and sole carbon source of xylitol (XYI), lactose (LAT), galactooligosaccharides (GOS), fructooligosaccharides (FOS), and inulin (INU).

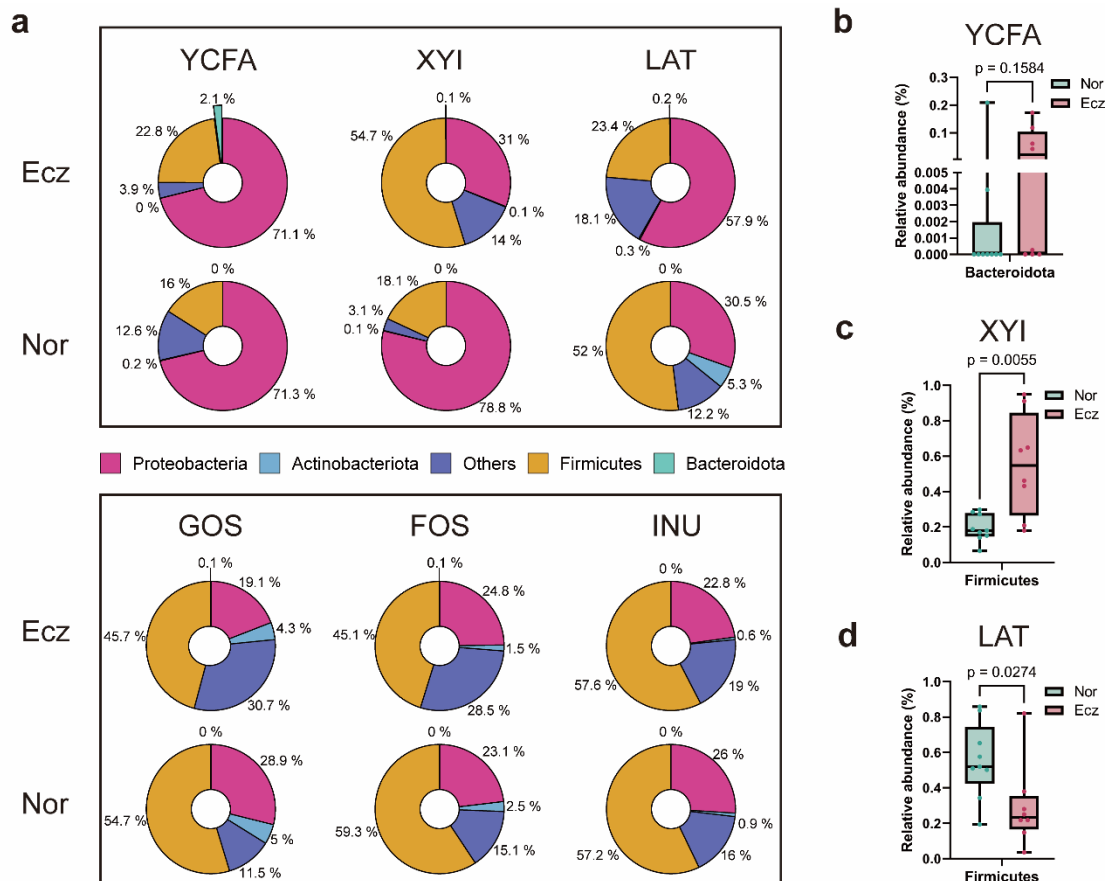

**Supplementary Fig. S3 Comparison of relative abundance at phylum level after fermentation.**

a: Pie chart at phylum level between Ecz and Nor after fermentations. Bacteroidota are highlighted; b: Box plot of phylum Bacteroidota in YCFA; c: Box plot of phylum Firmicutes in XYI ; d: Box plot of phylum Firmicutes in LAT. YCFA: the basic medium without carbon source; the medium containing YCFA and sole carbon source of xylitol (XYI), lactose (LAT). Data in box plots are presented as: box, medians with interquartile ranges; whiskers: min to max; points: all data. Statistical analysis was performed using Mann-Whitney test and  $p < 0.2$  was shown.

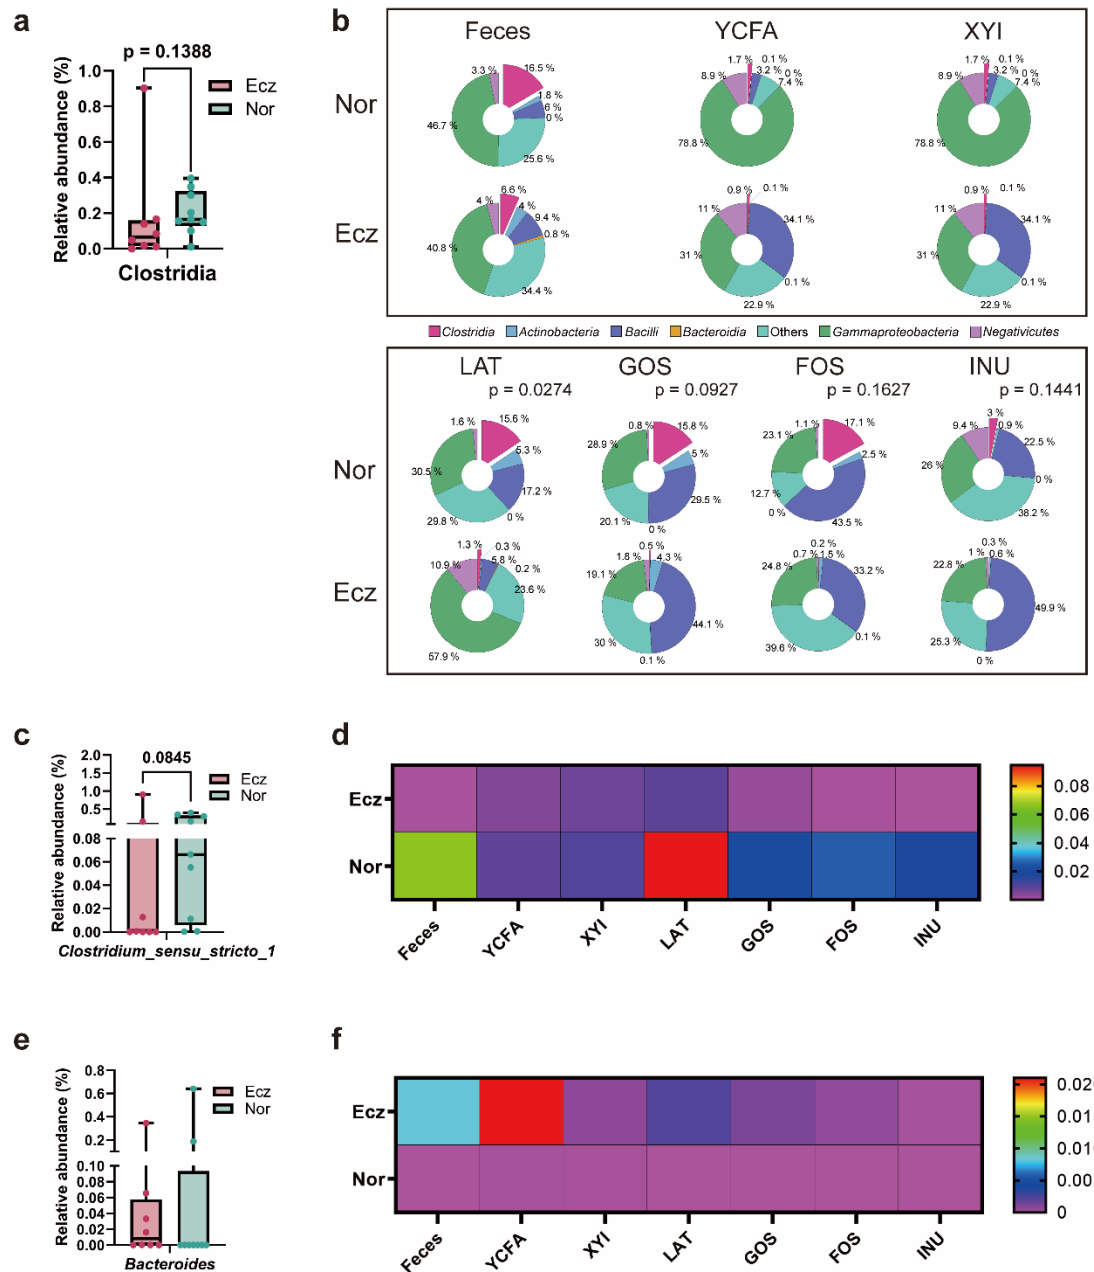

**Supplementary Fig. S4 Taxa with the same intergroup variation trends between Ecz and Nor in feces and their broths.**

a: Boxplot of class *Clostridia* in feces; b: Pie chart of class level in feces and broths, *Clostridia* is highlighted and its statistical difference between two groups was calculated using Mann-Whitney test, and the significant difference was shown in LAT; c: Boxplot of genus *Clostridium\_sensu\_stricto\_1* in feces; d: Heatmap of *Clostridium\_sensu\_stricto\_1* in feces and broths, with an increased trend in Nor group; e: Boxplot of genus *Bacteroides* in feces; f: Heatmap of genus *Bacteroides* in feces and broths, with an increased trend in Ecz group. Data in boxplot are presented as medians with interquartile ranges and analyzed using Mann-Whitney test, and  $p < 0.2$  was shown.

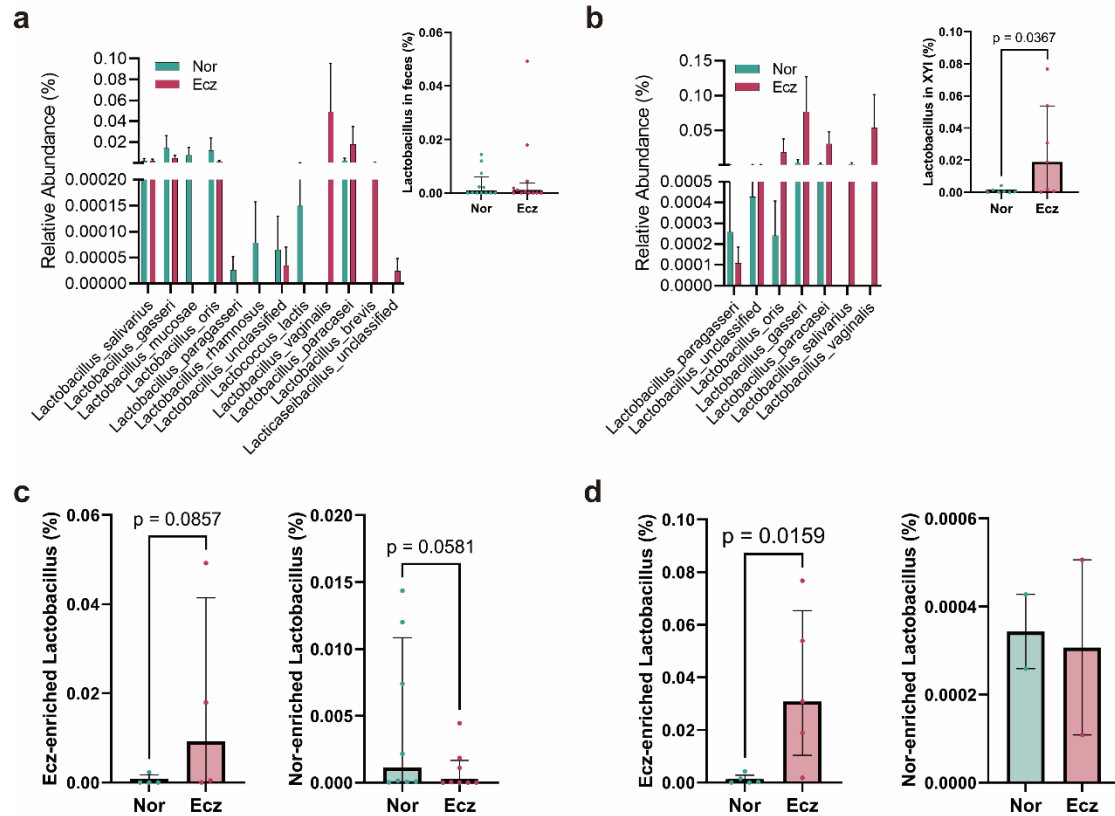

**Supplementary Fig. S5 Comparison of relative abundance of *Lactobacillus* in feces and after XYI fermentation.**

a: The relative abundance of each species of *Lactobacillus* in feces, of which the sum showed no significant difference between Ecz and Nor (upper right panel); b: The relative abundance of each species of *Lactobacillus* in xylitol (XYI) broth, of which the sum was significantly higher in Ecz compared to Nor (upper right panel); c: Nor-enriched *Lactobacillus* and Ecz-enriched *Lactobacillus* were compared in their total relative abundance between two groups in feces; d: Nor-enriched *Lactobacillus* and Ecz-enriched *Lactobacillus* were compared in their total relative abundance between two groups in XYI broth. Only the top 60 species were analyzed. Data in interleaved bar are presented as mean and SEM. Data in scatter plot with bar are presented as medians with interquartile ranges. Mann-Whitney test was used for statistical analysis, and  $p < 0.1$  is shown.

## YCFA

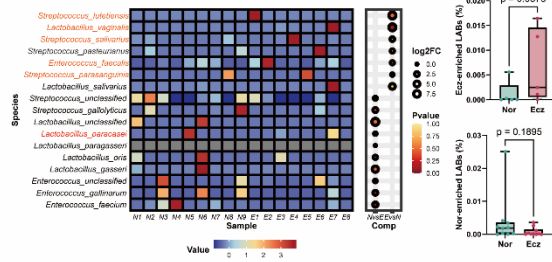

## XYI

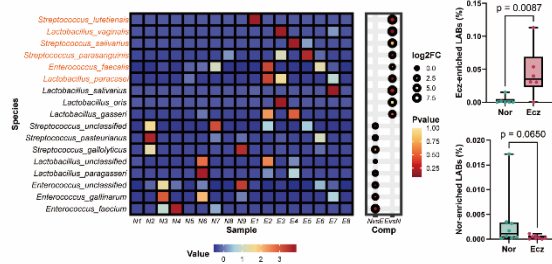

## LAT

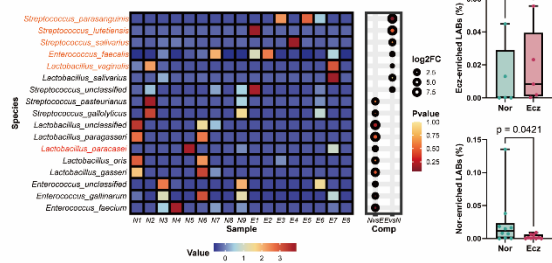

## GOS

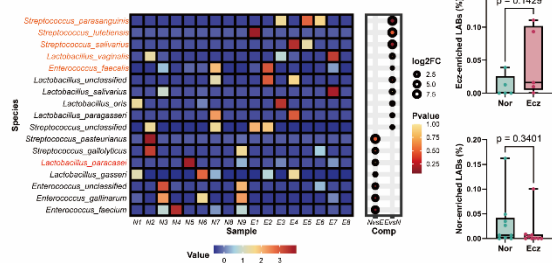

## FOS

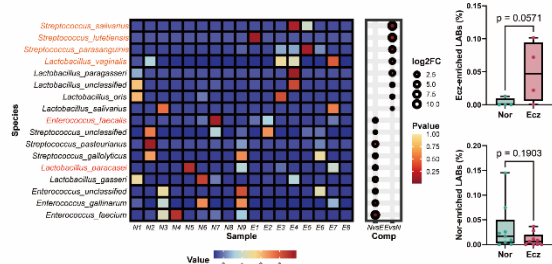

## INU

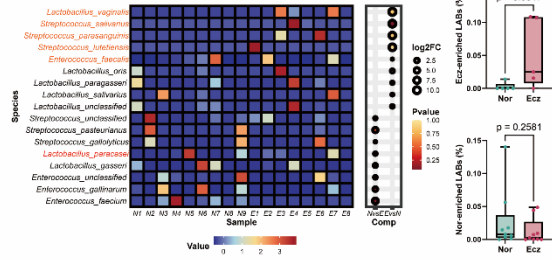



**Supplementary Fig. S6 Comparison of LABs in fermentation broths between Ecz and Nor.**

**Left panel:** Heatmap of relative abundance of LABs in each broth. Species belonging to faecal Ecz-enriched LABs are shown in red. **Right upper panel:** Box plot of the total relative abundance of faecal Ecz-enriched LABs which were still divided into the Ecz-enriched cluster (shown in left panel). **Right lower panel:** Box plot of the total relative abundance of Nor-enriched LABs in the left panel. YCFA: the basic medium without carbon source; the medium containing YCFA and sole carbon source of xylitol (XYI), lactose (LAT), galactooligosaccharides (GOS), fructooligosaccharides (FOS), and inulin (INU). Data in box plots are presented as: box, medians with interquartile ranges; whiskers: min to max; points: all data. Mann-Whitney test was used for statistical analysis.

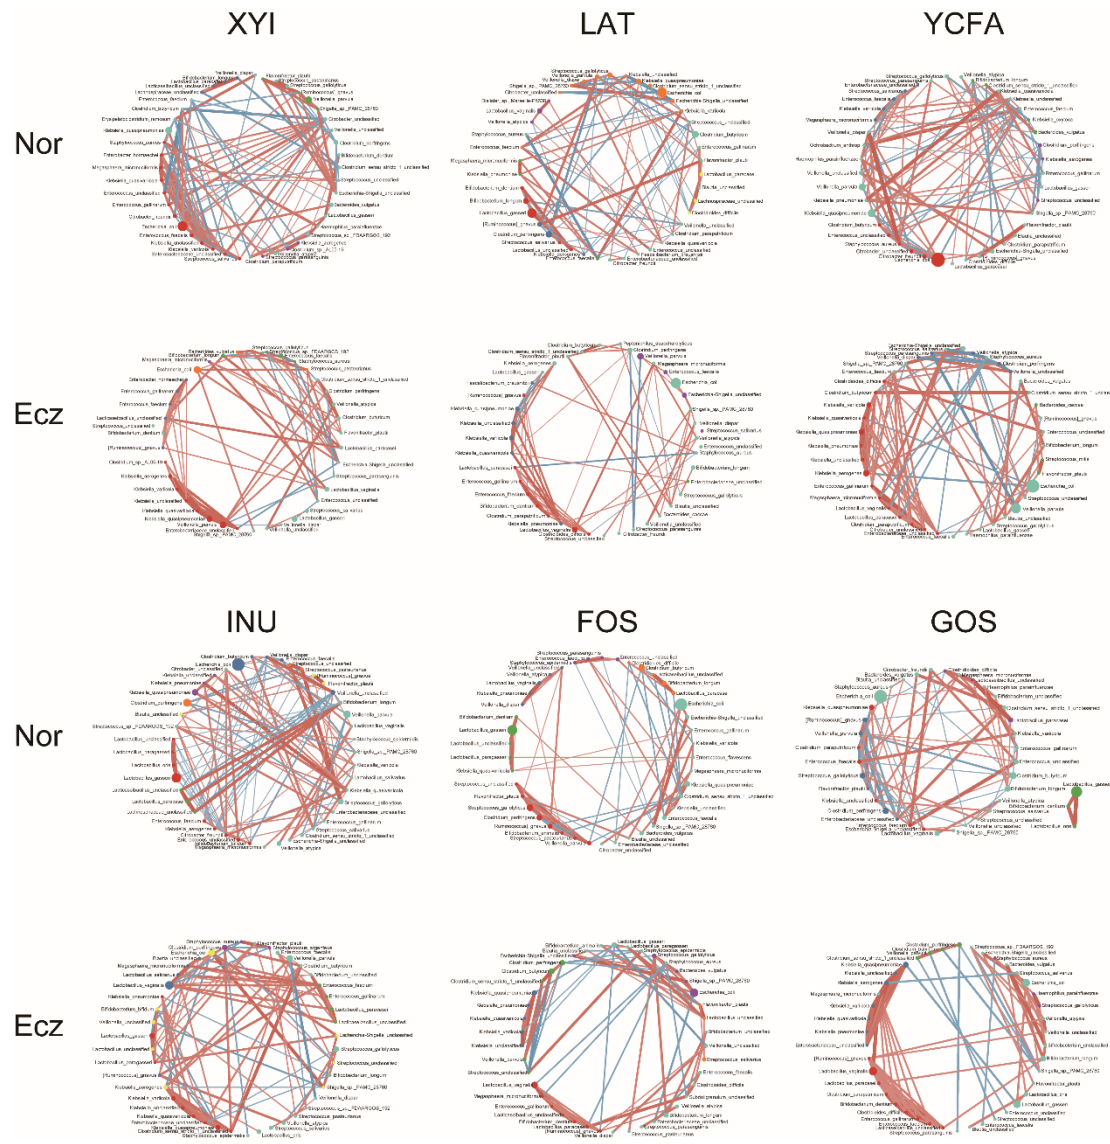

**Supplementary Fig. S7 The co-occurrence network diagrams of fermentation broths' microbiota in Nor and Ec2.**

The network diagrams were drawn using Cytoscape. The relative abundance of nodes (species) is represented by size, and clusters (modules) are distinguished by color. Red edges indicate positive correlations, while blue edges indicate negative correlations. YCFA: the basic medium without carbon source; the medium containing YCFA and sole carbon source of xylitol (XYI), lactose (LAT), galactooligosaccharides (GOS), fructooligosaccharides (FOS), and inulin (INU).
